# Supplementary material for: Combined associations of body weight and lifestyle factors with all cause and cause specific mortality in men and women: prospective cohort study
Source: PubMed Central journal article supplement — BMJ. 2016 Nov 24;355:i5855. doi: 10.1136/bmj.i5855 (PMC5122318; doi:10.1136/bmj.i5855), 2016-11-24
Supplement: vern034265.ww1_default.pdf [file vern034265.ww1_default.pdf]

**Appendix 1: Supplementary tables [posted as supplied by author]**

**Table A. Sample sizes before and after baseline exclusions in the NHS and HPFS cohorts**

|                                  | <b>NHS</b> | <b>HPFS</b> |
|----------------------------------|------------|-------------|
| Year of baseline                 | 1980       | 1976        |
| Baseline sample                  | 98,712     | 51,529      |
| Baseline exclusion               |            |             |
| Cancer                           | 3972       | 2160        |
| Cardiovascular diseases          | 2308       | 3996        |
| Missing BMI                      | 591        | 1032        |
| Missing physical activity        | 12307      | 2237        |
| Missing smoking                  | 142        | 1664        |
| Missing FFQ (AHEI and alcohol)   | 4810       | 1156        |
| Sample size for study population | 74,582     | 39,284      |

The Nurses' Health Study (NHS) began in 1976, when 121,701 female nurses responded. In 1980, 98,712 nurses response the long questionnaire including questions with detail food items (FFQ) and physical activities, which was treated as the baseline for NHS in the current study.

**Table B: The number of deaths, person years and crude incident rate (IR) according to joint classifications of body mass index and healthy lifestyle scores\***

|                                   | BMI (kg/m <sup>2</sup> ) |             |             |             |             |
|-----------------------------------|--------------------------|-------------|-------------|-------------|-------------|
|                                   | <18.5                    | 18.5-22.4   | 22.5-24.9   | 25.0-29.9   | >=30        |
| <b>Case (crude incident rate)</b> |                          |             |             |             |             |
| <b>All-cause mortality</b>        |                          |             |             |             |             |
| None healthy lifestyle            | 266 (2971)               | 2163 (1497) | 2257 (1471) | 3302 (1566) | 1561 (1566) |
| One healthy lifestyle             | 237 (1752)               | 2485 (871)  | 3091 (965)  | 4633 (1090) | 2089 (1163) |
| Two healthy lifestyles            | 92 (992)                 | 1307 (573)  | 1746 (682)  | 2217 (756)  | 791 (866)   |
| Three healthy lifestyles          | 19 (578)                 | 385 (413)   | 547 (516)   | 536 (529)   | 116 (603)   |
| Four healthy lifestyles           | 1 (216)                  | 43 (284)    | 62 (322)    | 61 (399)    | 7 (457)     |
| <b>Cancer mortality</b>           |                          |             |             |             |             |
| None healthy lifestyle            | 69 (771)                 | 765 (529)   | 804 (524)   | 1132 (537)  | 478 (479)   |
| One healthy lifestyle             | 70 (518)                 | 913 (320)   | 1207 (377)  | 1633 (384)  | 672 (374)   |
| Two healthy lifestyles            | 22 (237)                 | 518 (227)   | 702 (274)   | 817 (279)   | 272 (298)   |
| Three healthy lifestyles          | 5 (152)                  | 156 (167)   | 238 (224)   | 227 (224)   | 38 (198)    |
| Four healthy lifestyles           | 1 (216)                  | 17 (112)    | 24 (125)    | 20 (131)    | 2 (131)     |
| <b>CVD mortality</b>              |                          |             |             |             |             |
| None healthy lifestyle            | 36 (402)                 | 424 (293)   | 484 (316)   | 863 (409)   | 460 (461)   |
| One healthy lifestyle             | 45 (333)                 | 466 (163)   | 680 (212)   | 1230 (289)  | 590 (328)   |
| Two healthy lifestyles            | 20 (216)                 | 248 (109)   | 412 (161)   | 594 (203)   | 241 (264)   |
| Three healthy lifestyles          | 0 (0)                    | 75 (80)     | 125 (118)   | 129 (127)   | 25 (130)    |
| Four healthy lifestyles           | 0 (0)                    | 9 (59)      | 19 (99)     | 15 (98)     | 3 (196)     |
| <b>Person years</b>               |                          |             |             |             |             |
| None healthy lifestyle            | 8953                     | 144535      | 153398      | 210840      | 99699       |
| One healthy lifestyle             | 13525                    | 285415      | 320339      | 425010      | 179695      |
| Two healthy lifestyles            | 9274                     | 228238      | 255868      | 293228      | 91357       |
| Three healthy lifestyles          | 3289                     | 93172       | 106103      | 101323      | 19237       |
| Four healthy lifestyles           | 463                      | 15138       | 19272       | 15302       | 1531        |

\*Low risk lifestyles include never-smoking, exercise  $\geq 30$  min/d at moderate or vigorous intensity, the Alternate Healthy Eating Index score in the upper two fifth (quintiles), and moderate alcohol consumption (moderate: 5 to 15 g alcohol/d in women, 5–30 g alcohol/d in men). Each factor was coded as 0 or 1 and sum three scores together, so the healthy lifestyles scores were 0, 1, 2, 3 or 4 (healthiest).

**Table C: Age-adjusted baseline Characteristics according to BMI categories in the Nurses' Health Study (NHS, 1980) and Health Professions' Follow-up Study (HPFS, 1986)**

| <b>BMI (kg/m<sup>2</sup>)</b>  | <b>&lt;<br/>18.5</b> | <b>18.5-<br/>22.4</b> | <b>22.5-<br/>24.9</b> | <b>25.0-<br/>27.4</b> | <b>27.5-<br/>29.9</b> | <b>30.0-<br/>34.9</b> | <b>35.0-<br/>39.9</b> | <b>&gt;=<br/>40</b> |
|--------------------------------|----------------------|-----------------------|-----------------------|-----------------------|-----------------------|-----------------------|-----------------------|---------------------|
| <b>NHS, 1980</b>               |                      |                       |                       |                       |                       |                       |                       |                     |
| n                              | 1492                 | 29125                 | 19105                 | 11563                 | 5362                  | 5552                  | 1724                  | 659                 |
| Age, years *                   | 44.1                 | 44.6                  | 46.4                  | 47.3                  | 47.4                  | 47.1                  | 46.3                  | 46.7                |
| BMI, kg/m <sup>2</sup>         | 17.7                 | 20.9                  | 23.7                  | 26.2                  | 28.8                  | 32.0                  | 37.0                  | 43.6                |
| Alternate Healthy Eating Index | 30.6                 | 31.3                  | 31.2                  | 30.9                  | 30.6                  | 30.2                  | 29.8                  | 29.5                |
| Physical activity, hours/week  | 3.8                  | 4.2                   | 3.9                   | 3.7                   | 3.5                   | 3.3                   | 2.9                   | 2.7                 |
| Current smoking, %             | 45.6                 | 32.1                  | 28.5                  | 26.9                  | 25.2                  | 21.9                  | 21.2                  | 18.2                |
| Alcohol consumption, gram/day  | 7.6                  | 7.6                   | 6.7                   | 5.7                   | 4.8                   | 3.8                   | 2.8                   | 2.6                 |
| Caucasian, %                   | 97.9                 | 98.0                  | 97.6                  | 97.3                  | 96.8                  | 96.9                  | 97.4                  | 96.0                |
| Post-menopausal, %             | 46.2                 | 42.3                  | 42.8                  | 43.2                  | 43.2                  | 43.3                  | 42.1                  | 40.7                |
| Aspirin use, %                 | 57.9                 | 55.0                  | 53.1                  | 51.5                  | 51.3                  | 49.3                  | 48.1                  | 44.4                |
| Multivitamin use, %            | 61.4                 | 63.5                  | 66.1                  | 67.8                  | 69.1                  | 70.5                  | 73.4                  | 71.8                |
| Family history of diabetes, %  | 21.2                 | 24.1                  | 28.1                  | 30.6                  | 33.5                  | 38.1                  | 40.2                  | 39.8                |
| Family history of MI, %        | 22.8                 | 22.9                  | 24.7                  | 25.5                  | 27.0                  | 27.2                  | 27.1                  | 27.9                |
| Family history of cancer, %    | 14.2                 | 13.8                  | 13.8                  | 13.5                  | 13.2                  | 13.6                  | 13.0                  | 14.2                |
| <b>HPFS, 1986</b>              |                      |                       |                       |                       |                       |                       |                       |                     |
| n                              | 139                  | 5639                  | 13092                 | 12585                 | 4805                  | 2564                  | 339                   | 121                 |
| Age, years *                   | 55.3                 | 52.2                  | 52.6                  | 53.2                  | 53.3                  | 53.0                  | 51.6                  | 52.5                |
| BMI, kg/m <sup>2</sup>         | 17.4                 | 21.5                  | 23.8                  | 26.1                  | 28.6                  | 31.7                  | 36.7                  | 47.5                |
| Alternate Healthy Eating Index | 45.1                 | 47.9                  | 47.5                  | 46.2                  | 45.5                  | 45.1                  | 43.4                  | 47.1                |
| Physical activity, hours/week  | 2.2                  | 3.3                   | 3.2                   | 2.7                   | 2.2                   | 1.7                   | 1.2                   | 2.1                 |
| Current smoking, %             | 24.1                 | 11.2                  | 8.9                   | 9.9                   | 10.4                  | 9.8                   | 8.9                   | 9.7                 |
| Alcohol consumption, gram/day  | 12.5                 | 10.6                  | 11.6                  | 11.6                  | 11.8                  | 10.4                  | 9.6                   | 10.9                |
| Caucasian, %                   | 89.3                 | 92.8                  | 94.2                  | 94.5                  | 94.5                  | 94.6                  | 96.0                  | 93.8                |
| Aspirin use, %                 | 76.7                 | 75.3                  | 73.5                  | 71.4                  | 70.5                  | 70.2                  | 71.3                  | 72.2                |
| Multivitamin use, %            | 34.4                 | 33.6                  | 36.7                  | 39.8                  | 42.1                  | 43.8                  | 45.5                  | 37.2                |
| Family history of diabetes, %  | 12.6                 | 18.2                  | 19.6                  | 21.7                  | 22.7                  | 26.6                  | 28.9                  | 23.4                |
| Family history of MI, %        | 31.1                 | 31.9                  | 31.3                  | 32.2                  | 32.5                  | 33.6                  | 33.3                  | 43.5                |
| Family history of cancer, %    | 31.3                 | 34.4                  | 34.8                  | 34.3                  | 33.8                  | 34.2                  | 28.9                  | 23.6                |

BMI: Body Mass Index; MI: Myocardial Infarction

**Table D: Distribution proportion of low-risk lifestyle factors (%) according to the BMI categories**

| BMI<br>(kg/m <sup>2</sup> ) | Number of low-risk factors (PYs, %) |      |      |             |            |
|-----------------------------|-------------------------------------|------|------|-------------|------------|
|                             | None                                | One  | Two  | Three       | Four       |
| <b>NHS</b>                  |                                     |      |      |             |            |
| <18.5                       | 26.0                                | 38.2 | 25.6 | 9.0         | 1.1        |
| 18.5-22.4                   | 20.3                                | 38.7 | 29.2 | 10.5        | 1.3        |
| 22.5-24.9                   | 21.2                                | 40.7 | 28.2 | 8.9         | 1.1        |
| 25.0-27.4                   | 22.6                                | 43.3 | 26.3 | 7.2         | 0.7        |
| 27.5-29.9                   | 24.1                                | 44.9 | 25.0 | 5.6         | 0.5        |
| 30.0-34.9                   | 25.5                                | 46.8 | 23.2 | 4.3         | 0.2        |
| 35.0-39.9                   | 27.0                                | 49.3 | 20.6 | 3.0         | 0.1        |
| >=40                        | 30.5                                | 47.4 | 19.3 | 2.7         | 0.1        |
| <b>Total</b>                | 22.2                                | 41.9 | 26.9 | <b>8.0</b>  | <b>0.9</b> |
| <b>HPFS</b>                 |                                     |      |      |             |            |
| <18.5                       | 21.5                                | 36.7 | 28.3 | 10.7        | 2.8        |
| 18.5-22.4                   | 11.9                                | 28.8 | 32.5 | 21.2        | 5.6        |
| 22.5-24.9                   | 11.9                                | 31.2 | 33.2 | 19.1        | 4.6        |
| 25.0-27.4                   | 15.3                                | 35.2 | 31.5 | 15.0        | 3.0        |
| 27.5-29.9                   | 18.2                                | 37.8 | 30.1 | 12.0        | 2.0        |
| 30.0-34.9                   | 22.8                                | 40.1 | 27.1 | 8.8         | 1.2        |
| 35.0-39.9                   | 25.8                                | 43.0 | 23.8 | 6.7         | 0.7        |
| >=40                        | 25.6                                | 34.3 | 27.0 | 11.8        | 1.3        |
| <b>Total</b>                | 14.9                                | 33.9 | 31.6 | <b>16.1</b> | <b>3.5</b> |
